# Supplementary material for: Simultaneous Dispersive Liquid–Liquid Microextraction and Determination of Different Polycyclic Aromatic Hydrocarbons in Surface Water
Source: MDPI journal article supplement (doi:10.3390/molecules27238586), 2022-12-05
Supplement: s1 [file s1]

## Supplementary materials

**Table S1.** The results obtained for different extraction systems containing chloroform for DLLME.

| No | Dispersive agent      | Volume, mL  | Observation   |
|----|-----------------------|-------------|---------------|
| 1  | Acetonitrile          | 0.5         | lack of drop  |
| 2  |                       | 1.0         | unstable drop |
| 3  |                       | 1.2         |               |
| 4  |                       | 1.5         | stable drop   |
| 5  |                       | 1.7         | unstable drop |
| 6  | Methanol              | 0.2         | stable drop   |
| 7  |                       | 0.4         |               |
| 8  |                       | 0.5         | unstable drop |
| 9  |                       | 1.0         | lack of drop  |
| 10 |                       | 1.5         | lack of drop  |
| 11 | Acetone               | 0.5         |               |
| 12 |                       | 0.6         |               |
| 13 |                       | 0.8         |               |
| 14 |                       | 1.0         |               |
| 15 |                       | 1.2         |               |
| 16 | Acetone+acetonitrile  | 1.0 + 0.5   | lack of drop  |
| 17 |                       | 0.50 + 0.50 | stable drop   |
| 18 |                       | 0.33 + 0.66 |               |
| 19 |                       | 0.25 + 0.75 |               |
| 20 | Methanol+acetonitrile | 1.0+0.5     | lack of drop  |
| 21 |                       | 0.75+0.75   | stable drop   |
| 22 |                       | 0.5+1.0     |               |
| 23 |                       | 0.4+1.1     |               |
| 24 | Methanol+acetone      | 1.0+0.5     | lack of drop  |
| 25 |                       | 0.5+0.5     | stable drop   |
| 26 |                       | 0.2+0.8     |               |
| 27 |                       | 0.2+1.0     |               |
| 28 |                       | 0.5+1.0     |               |

**Table S2.** Analytical performance of the DLLME with binary solvents as dispersive agent for the determination of PAHs in waters.

| PAHs          | LOD, ng/L    |       | LOQ, ng/L    |       | Linearity range , ng/L |           | Intra-day precision (n=16) |       | Inter day precision (n=10) |       |
|---------------|--------------|-------|--------------|-------|------------------------|-----------|----------------------------|-------|----------------------------|-------|
|               | HPLC-FD/ PDA | GC-MS | HPLC-FD/ PDA | GC-MS | HPLC-FD/ PDA           | GC-MS     | HPLC-FD/ PDA               | GC-MS | HPLC-FD/ PDA               | GC-MS |
| Naph          | 0.07         | 6.0   | 0.20         | 20    | 0.20 – 1000            | 20 – 7500 | 6.5                        | 7.1   | 7.0                        | 8.2   |
| 2-MN          | 0.05         | 4.5   | 0.15         | 15    | 0.15 – 1000            | 15 – 7500 | 6.5                        | 7.8   | 5.5                        | 7.6   |
| Biph          | 0.05         | 4.5   | 0.15         | 15    | 0.15 – 1000            | 15 – 7500 | 5.1                        | 6.5   | 5.8                        | 6.7   |
| Acy           | 0.05         | 4.5   | 0.15         | 15    | 0.15 – 1000            | 15 – 7500 | 4.9                        | 5.2   | 5.2                        | 5.8   |
| Ace           | 0.05         | 4.5   | 0.15         | 15    | 0.15 – 1000            | 15 – 7500 | 4.2                        | 4.5   | 5.3                        | 6.1   |
| Flu           | 0.05         | 3.0   | 0.15         | 10    | 0.15 – 1000            | 10 – 7500 | 5.1                        | 5.5   | 5.2                        | 6.2   |
| Phe           | 0.05         | 3.0   | 0.15         | 10    | 0.15 – 1000            | 10 – 7500 | 3.1                        | 3.7   | 4.8                        | 6.3   |
| Anth          | 0.05         | 3.0   | 0.15         | 10    | 0.15 – 1000            | 10 – 7500 | 4.2                        | 4.0   | 4.7                        | 5.8   |
| Pyr           | 0.05         | 3.0   | 0.15         | 10    | 0.15 – 1000            | 10 – 7500 | 3.3                        | 3.9   | 4.6                        | 5.7   |
| Fluor         | 0.05         | 3.0   | 0.15         | 10    | 0.15 – 1000            | 10 – 7500 | 3.8                        | 3.7   | 4.5                        | 5.9   |
| B[a]A         | 0.03         | 3.0   | 0.10         | 10    | 0.10 – 750             | 10 – 7500 | 4.4                        | 4.0   | 4.3                        | 5.8   |
| Chry          | 0.03         | 3.0   | 0.10         | 10    | 0.10– 750              | 10 – 7500 | 4.1                        | 4.5   | 4.5                        | 5.4   |
| Triph         | 0.03         | 3.0   | 0.10         | 10    | 0.10– 750              | 10 – 7500 | 3.9                        | 4.2   | 4.4                        | 5.5   |
| B[b]F         | 0.03         | 3.0   | 0.10         | 10    | 0.10– 750              | 10 – 7500 | 4.5                        | 5.1   | 5.2                        | 6.0   |
| B[k]F         | 0.03         | 3.0   | 0.10         | 10    | 0.10– 750              | 10 – 7500 | 4.3                        | 5.2   | 4.5                        | 5.9   |
| B[a]P         | 0.03         | 3.0   | 0.10         | 10    | 0.10– 750              | 10 – 7500 | 4.2                        | 5.3   | 5.3                        | 5.8   |
| B[e]P         | 0.03         | 3.0   | 0.10         | 10    | 0.10– 750              | 10 – 7500 | 4.3                        | 5.0   | 5.1                        | 6.1   |
| I[1,2,3-c,d]P | 0.03         | 3.0   | 0.10         | 10    | 0.10– 750              | 10 – 7500 | 3.4                        | 3.8   | 4.7                        | 5.8   |
| D[a,h]A       | 0.03         | 3.0   | 0.10         | 10    | 0.10– 750              | 10 – 7500 | 3.3                        | 3.9   | 4.8                        | 5.9   |
| B[g,h,i]P     | 0.03         | 3.0   | 0.10         | 10    | 0.10– 750              | 10 – 7500 | 3.2                        | 3.7   | 4.5                        | 5.5   |
